# Supplementary material
Source: publisher figshare collection journal article supplement (https://asha.figshare.com/articles/dataset/_/6170186)
Supplement: Supplementary file 1 [file 1]

**Supplemental Text A. Round 1 questionnaire.**

| <b>Round 1 Closed-ended questions</b>                                                                                         |                                                                                                                                                                                                                                                                                                                                                                                                                       |
|-------------------------------------------------------------------------------------------------------------------------------|-----------------------------------------------------------------------------------------------------------------------------------------------------------------------------------------------------------------------------------------------------------------------------------------------------------------------------------------------------------------------------------------------------------------------|
| <b>11-point Likert scale: 1 (<i>strongly disagree</i>), 6 (<i>neither agree nor disagree</i>), 11 (<i>strongly agree</i>)</b> |                                                                                                                                                                                                                                                                                                                                                                                                                       |
| <b>1</b>                                                                                                                      | Parent-to-parent support is the appropriate phrasing to describe this conceptual framework.                                                                                                                                                                                                                                                                                                                           |
| <b>2</b>                                                                                                                      | Supporting parent(s) have the lived experience of a child with hearing loss.                                                                                                                                                                                                                                                                                                                                          |
| <b>3</b>                                                                                                                      | The learning parent(s) have a child with hearing loss who are seeking support from an experienced parent.                                                                                                                                                                                                                                                                                                             |
| <b>4</b>                                                                                                                      | Mutuality is the exchange of information, ideas and resources with peer mentors and role models. Mutuality is the appropriate word.                                                                                                                                                                                                                                                                                   |
| <b>5</b>                                                                                                                      | Connectedness refers to social identity, affirmation, a sense of belonging, social kinship. Connectedness is the appropriate word.                                                                                                                                                                                                                                                                                    |
| <b>6</b>                                                                                                                      | Connectedness and mutuality are components to describe the relationship between the supporting parent and the learning parent. Are there additional components of the parent-to-parent relationship that should be included in this category?                                                                                                                                                                         |
| <b>7</b>                                                                                                                      | For child well-being, the learning parent(s) need support related to child-autonomy, participation and goals. Autonomy: decision-making, stress-related coping strategies, persistence. Autonomy is the appropriate word.                                                                                                                                                                                             |
| <b>8</b>                                                                                                                      | Participation: participation in hearing and Deaf communities, leisure and extracurricular activities, daycare/school, and ventures with family and friends. Participation is the appropriate word.                                                                                                                                                                                                                    |
| <b>9</b>                                                                                                                      | Goals: language achievement, communication outcomes, employment objectives. Goals is the appropriate word.                                                                                                                                                                                                                                                                                                            |
| <b>10</b>                                                                                                                     | Autonomy, Goals and Participation are components of child well-being. Are there additional components of child well-being that should be included in this category?                                                                                                                                                                                                                                                   |
| <b>11</b>                                                                                                                     | In terms of parent and family well-being the learning parent(s) indicate that they need relational, emotional and adaptational support from the supporting parent for their well-being and the well-being of other family members. Relational: bonding with the child, family functioning, family and marital cohesiveness, interaction and communication between family members. Relational is the appropriate word. |
| <b>12</b>                                                                                                                     | Emotional: parent-to-parent support offers psychological benefit such as coping, self-reliance, confidence, readiness to engage and bravery in response to grief, loneliness, vulnerability and perceived stigma. Emotional is the appropriate word.                                                                                                                                                                  |
| <b>13</b>                                                                                                                     | Adaptational: parent-to-parent support helps with adjustment, acceptance, motivation, hopefulness, resilience, learning and optimism. Adaptational is the appropriate word.                                                                                                                                                                                                                                           |
| <b>14</b>                                                                                                                     | Relational, Emotional and Adaptational are components of parent(s) and family well-being. Are there additional components of parent(s) and family well-being that should be included in this category?                                                                                                                                                                                                                |
| <b>15</b>                                                                                                                     | In terms of advocacy, the learning parent(s) indicate that they need to know about legal rights, funding and representation from the supporting parent for an accurate knowledge base. Legal rights: laws, human rights, child's rights and special education laws. Legal rights are the appropriate words.                                                                                                           |
| <b>16</b>                                                                                                                     | Funding: financial assistance, insurance, government funding, not-for-profit supplements. Funding is the appropriate word.                                                                                                                                                                                                                                                                                            |
| <b>17</b>                                                                                                                     | Representation: peer advocate, parental consultant, advocate at local, provincial, and federal levels. Representation is the appropriate word.                                                                                                                                                                                                                                                                        |
| <b>18</b>                                                                                                                     | Legal rights, Funding and Representation are components of advocacy knowledge. Are there additional components of advocacy knowledge that should be included in this category?                                                                                                                                                                                                                                        |

|                                                                                                                            |                                                                                                                                                                                                                                                                                                                                            |
|----------------------------------------------------------------------------------------------------------------------------|--------------------------------------------------------------------------------------------------------------------------------------------------------------------------------------------------------------------------------------------------------------------------------------------------------------------------------------------|
| 19                                                                                                                         | In terms of system navigation, the learning parent(s) indicate that they need to know about professionals, services and transitions from the supporting parent. Professionals: provide a roadmap of care, coordinate efforts with specialists, facilitate understanding of the role of specialists. Professionals is the appropriate word. |
| 20                                                                                                                         | Services: maneuvering through health care, school, legal and community services. Services is the appropriate word.                                                                                                                                                                                                                         |
| 21                                                                                                                         | Transitions: entering daycare, school, becoming an adolescent, career exploration. Transitions is the appropriate word.                                                                                                                                                                                                                    |
| 22                                                                                                                         | Professionals, Services and Transitions are important components of system navigation knowledge. Are there additional components of system navigation knowledge that should be included in this category?                                                                                                                                  |
| 23                                                                                                                         | In terms of resources, parent-to-parent support provides referrals to recognized affiliations, community partners and support programs. Resources is the appropriate word.                                                                                                                                                                 |
| 24                                                                                                                         | In terms of information, parent-to-parent support provides accurate, well-balanced and comprehensive information regarding technological and research advancements, communication and assistive device options. Information is the appropriate word.                                                                                       |
| 25                                                                                                                         | In terms of skills, parent-to-parent support provides skill-based instruction, such as sign language and device-appropriate/technological skills, as a supplement to professional support. Skills is the appropriate word.                                                                                                                 |
| 26                                                                                                                         | Resources, Information and Skills are important components of education knowledge. Are there additional components of education knowledge that should be included in this category?                                                                                                                                                        |
| 27                                                                                                                         | Engagement: Parent-to-parent support helps learning parent(s) with their ability and readiness to assume their parental role and engage in their child's habilitation process. Engagement is the appropriate word.                                                                                                                         |
| 28                                                                                                                         | Decision making: Parent-to-parent support provides access to knowledge and resources, and the opportunity to cultivate ideas for informed decision making. Decision making is the appropriate word.                                                                                                                                        |
| 29                                                                                                                         | Parenting: Parent-to-parent support provides practical parenting skills (e.g. teaching their child to safely cross the street) and offers parenting advice to improve parent-child interactions. Parenting is the appropriate word.                                                                                                        |
| 30                                                                                                                         | Self-awareness Parent-to-parent support may provide a sense of self-awareness. Self-awareness is a process; parents build on areas of strength, acknowledge areas to learn and become confident to act in-line with family values. Self-awareness is the appropriate word.                                                                 |
| 31                                                                                                                         | Problem-solving: Parent-to-parent support empowers parents to trust their coping abilities and acquire problem-solving skills specific to a child who is deaf or hard of hearing. Problem-solving is the appropriate word.                                                                                                                 |
| 32                                                                                                                         | Engagement, Decision making, Parenting, Self-awareness, and Problem-solving are components of confidence & competence. Are there additional components of confidence & competence that should be included in this category?                                                                                                                |
| 33                                                                                                                         | In the flexure of the learning parent, arrows indicate relationships exist between the defining constructs, namely that knowledge and well-being promote empowerment and empowerment and knowledge increase well-being. These relationships are appropriately indicated with the arrows.                                                   |
| <b>Round 1 Closed-ended questions</b>                                                                                      |                                                                                                                                                                                                                                                                                                                                            |
| <b>11-point Likert scale: 1 (<i>very uncertain</i>), 6 (<i>neither uncertain or certain</i>), 11 (<i>very certain</i>)</b> |                                                                                                                                                                                                                                                                                                                                            |
| 34                                                                                                                         | How certain are you that the conceptual framework is appropriately organized and designed?                                                                                                                                                                                                                                                 |
| 35                                                                                                                         | How certain are you that the conceptual framework identifies the components and constructs of parent-to-parent support for parents who are deaf or hard of hearing?                                                                                                                                                                        |

|           |                                                                                                                                                                              |
|-----------|------------------------------------------------------------------------------------------------------------------------------------------------------------------------------|
| <b>36</b> | How certain are you that this conceptual framework has the ability to serve as a model for parent-to-parent support for parents of children who are deaf or hard of hearing? |
| <b>37</b> | Overall, how certain are you that this conceptual framework is applicable to your work and/or your colleagues work?                                                          |
| <b>38</b> | How certain are you that this conceptual framework addresses the gap in the literature calling for a conceptual framework of parent-to-parent support?                       |
