# Supplementary material
Source: publisher figshare collection journal article supplement (https://asha.figshare.com/articles/dataset/_/6170186)
Supplement: Supplementary file 2 [file 1]

**Supplemental Text B. Round 2 questionnaire.**

| <b>Round 2 Closed-ended questions</b> |                                                                                                                                                                                                                                                                                                                                                                                                                                                                                                                                                                                                                                                                                                      |
|---------------------------------------|------------------------------------------------------------------------------------------------------------------------------------------------------------------------------------------------------------------------------------------------------------------------------------------------------------------------------------------------------------------------------------------------------------------------------------------------------------------------------------------------------------------------------------------------------------------------------------------------------------------------------------------------------------------------------------------------------|
| <b>Closed answer A or B</b>           |                                                                                                                                                                                                                                                                                                                                                                                                                                                                                                                                                                                                                                                                                                      |
| <b>1</b>                              | The average rating of 87% (scale 0-100) indicates that the average sentiment among respondents is that Supporting Parent is an appropriate descriptor to describe the parent with the lived experience of raising a child who is D/HH. Alternative labels were suggested, with a number of respondents suggesting Mentor Parent. Mentor Parent defined as: a teaching, supporting and encouraging parent who has the lived experience of a child with hearing loss. Click on the button beside the descriptor term(s) that you MOST PREFER.                                                                                                                                                          |
| <b>2</b>                              | The average rating of 75% (scale 0-100) indicates that the average sentiment among respondents is that Learning Parent is a mostly appropriate descriptor to describe the parent(s) who has/have a child who is D/HH and are seeking support from an experienced parent with a child who is D/HH. Alternative labels were suggested, with a number of respondents suggesting Novice Parent. Novice Parent defined as: a parent new to or inexperienced in a situation. For example, the parent may have a child recently diagnosed as D/HH or may be experiencing a transition in the child or family's life. Click on the button beside the descriptor term(s) that you MOST PREFER.                |
| <b>3</b>                              | The average rating of 78 (scale 0-100) indicates that the average sentiment among respondents is that Mutuality is a fairly appropriate descriptor to describe the exchange of information, ideas and resources with peer mentors and role models. Alternative labels were suggested, so with your input: Contribution is defined as: active interaction by mentors, peers and D/HH role models. It is the sharing of information, ideas and resources, including anecdotal and life stories. Click on the button beside the descriptor term(s) that you MOST PREFER.                                                                                                                                |
| <b>4</b>                              | The average rating of 87% (scale 0-100) indicates that the average sentiment among respondents is that Connectedness is an appropriate descriptor to refer to social identity, affirmation, a sense of belonging, social kinship. Alternative labels were suggested, with a number of respondents suggesting Connection. Connection refers to social identity, affirmation, validation, comfort, a sense of belonging, social and family kinship, and inclusion in a group. Click on the button beside the descriptor term(s) that you MOST PREFER.                                                                                                                                                  |
| <b>5</b>                              | The term autonomy received an average rating of 79, indicating respondents felt it more than adequately described decision-making, stress-related coping strategies and persistence. Respondents indicated self-determination was a better term and commented that the child's health and emotional well-being could be better represented by this descriptor. Self-determination is defined as autonomy, competence (self-efficacy) and relatedness. Click on the button beside the descriptor term(s) that you MOST PREFER.                                                                                                                                                                        |
| <b>6</b>                              | The term goals received an average rating of 86, indicating respondents felt it more than adequately described child well-being as related to language achievement, communication outcomes, and employment objectives. As alternatives to the descriptor 'goals', respondents suggested: 'aspirations', 'planning', 'goal-setting', 'positive perspectives' and 'outcomes'. Therefore based on these suggestions we are proposing outcomes as the descriptor for the conceptual framework. Outcomes: language and communication achievements, social and psychosocial aspirations and educational and employment objectives. Click on the button beside the descriptor term(s) that you MOST PREFER. |
| <b>7</b>                              | The term representation received an average rating of 83, indicating respondents agreed that it was an appropriate descriptor. Written comments revealed a potential preference for the descriptive term 'Advocate'. With your input: Advocate or Representation peer advocate, parental consultant, representative at local, provincial, and federal levels. Click on the button beside the descriptor term(s) that you MOST PREFER.                                                                                                                                                                                                                                                                |
| <b>8</b>                              | The term professionals received an average rating of 89, indicating respondents agreed that it was an appropriate descriptor. Written comments revealed a potential preference for the descriptive term 'Providers'. With your input: Providers: coordinate care with specialists, collaborate with stakeholders, provide a roadmap of care, and facilitate understanding of the role of the specialist(s). Click on the button beside the descriptor term(s) that you MOST PREFER.                                                                                                                                                                                                                  |

|                                     |                                                                                                                                                                                                                                                                                                                                                                                                                                                                                                                                                                                                                                                                                                                                                                                                           |
|-------------------------------------|-----------------------------------------------------------------------------------------------------------------------------------------------------------------------------------------------------------------------------------------------------------------------------------------------------------------------------------------------------------------------------------------------------------------------------------------------------------------------------------------------------------------------------------------------------------------------------------------------------------------------------------------------------------------------------------------------------------------------------------------------------------------------------------------------------------|
| 9                                   | The term skills received an average rating of 86, indicating respondents agreed that it was an appropriate descriptor. Written comments revealed a potential preference for the descriptive term 'Training'. With your input: Training: parent-to-parent support provides skill-based instruction, such as sign language and device-appropriate technological skills, as a supplement to provider/professional support. Click on the button beside the descriptor term(s) that you MOST PREFER.                                                                                                                                                                                                                                                                                                           |
| 10                                  | The term self-awareness received an average rating of 85, indicating respondents agreed the descriptor 'self-awareness' was appropriate. Written comments indicated that self-awareness "is a necessary condition in the process of developing and/or having competence & confidence." It was suggested that adaptation (taken from parent & family well-being) was a more appropriate descriptor. Adaptation: parent-to-parent support helps with adjustment and acceptance. Click on the button beside the descriptor term(s) that you MOST PREFER.                                                                                                                                                                                                                                                     |
| <b>Round 2 Open-ended questions</b> |                                                                                                                                                                                                                                                                                                                                                                                                                                                                                                                                                                                                                                                                                                                                                                                                           |
| 1                                   | Mentor Parent or Supporting Parent defined as: a teaching, supporting and encouraging parent who has the lived experience of a child with hearing loss. Please provide any written additions/edits that you would like to see made to the definition of this definition.                                                                                                                                                                                                                                                                                                                                                                                                                                                                                                                                  |
| 2                                   | Novice Parent or Learning Parent defined as: a parent new to or inexperienced in a situation. For example, the parent may have a child recently diagnosed as D/HH or may be experiencing a transition in the child or family's life. Please provide any written additions/edits that you would like to see made to this definition.                                                                                                                                                                                                                                                                                                                                                                                                                                                                       |
| 3                                   | Contribution or Mutuality is defined as: active interaction by mentors, peers and D/HH role models. It is the sharing of information, ideas and resources, including anecdotal and life stories. Please provide any written additions/edits that you would like to see made to this definition.                                                                                                                                                                                                                                                                                                                                                                                                                                                                                                           |
| 4                                   | Connection or Connectedness refers to social identity, affirmation, validation, comfort, a sense of belonging, social and family kinship, and inclusion in a group. Please provide any written additions/edits that you would like to see made to this definition.                                                                                                                                                                                                                                                                                                                                                                                                                                                                                                                                        |
| 5                                   | The term participation received an average rating of 94%, indicating respondents agreed strongly the word "participation" described involvement in hearing and Deaf communities, leisure and extracurricular activities, daycare/school, and ventures with family and friends. It is agreed that Participation is the appropriate descriptor. Please add comments if you wish.                                                                                                                                                                                                                                                                                                                                                                                                                            |
| 6                                   | Self-determination or Autonomy is defined as autonomy, competence (self-efficacy) and relatedness. Please provide any written additions/edits that you would like to see made to this definition.                                                                                                                                                                                                                                                                                                                                                                                                                                                                                                                                                                                                         |
| 7                                   | Outcomes or Goals: language and communication achievements, social and psychosocial aspirations and educational and employment objectives. Please provide any written additions/edits that you would like to see made to this definition.                                                                                                                                                                                                                                                                                                                                                                                                                                                                                                                                                                 |
| 8                                   | The term relational received an average rating of 89, indicating respondents agreed that it described bonding with the child, family functioning, family and marital cohesiveness, interaction and communication between family members. Some revisions have been made to the definition. Therefore, with your input: Relational: family functioning and community interaction. Family functioning refers to bonding with the child, family and marital/conjugal cohesiveness, communication between family members. Community interaction is involvement in community and cultural networks, friends and religious institutions. It is agreed that Relational is the appropriate descriptor. Please provide any written additions/edits that you would like to see made to the definition of Relational. |
| 9                                   | The term emotional received an average rating of 95, indicating respondents agreed strongly the word "emotional" described parent-to-parent support that offers psychological benefit such as coping, acceptance, hopefulness, self-reliance and confidence, readiness to engage in response to grief, loneliness, vulnerability and perceived stigma. It is agreed that Emotional is the appropriate descriptor. Please provide any written additions/edits that you would like to see made to the definition of Emotional.                                                                                                                                                                                                                                                                              |

|    |                                                                                                                                                                                                                                                                                                                                                                                                                                                                                                                                                                                                                                                                                                                                                                       |
|----|-----------------------------------------------------------------------------------------------------------------------------------------------------------------------------------------------------------------------------------------------------------------------------------------------------------------------------------------------------------------------------------------------------------------------------------------------------------------------------------------------------------------------------------------------------------------------------------------------------------------------------------------------------------------------------------------------------------------------------------------------------------------------|
| 10 | The term adaptational received an average rating of 83, indicating respondents agreed that it was an appropriate word to describe parent-to-parent support that helped with adjustment, acceptance, motivation, hopefulness, resilience, learning and optimism. Respondents indicated that adaptation is a component of competence & confidence and not well-being. We have moved the qualities of adaptation, such as acceptance and adjustment to the framework components of Competence and Confidence. Including adaptational within the components of Competence and Confidence is appropriate                                                                                                                                                                   |
| 11 | The term legal rights received an average rating of 91, indicating respondents strongly agreed that it was an appropriate descriptor. Some respondents preferred the descriptors 'regulation(s)' or 'legislation' over 'legal rights'. Although 'regulatory rights' may be more accurate, we believe that parents may better understand the descriptor 'legal rights'. Legal Rights: laws, regulations and legislation related to human rights, child's rights, and special education laws. Given the high consensus on this term, we have decided to keep the descriptor 'legal rights'. It is agreed that Legal Rights is the appropriate descriptor. Please provide any written additions/edits that you would like to see made to the definition of Legal Rights. |
| 12 | Financial Resources or Funding: financial assistance, insurance, government funding, not-for-profit supplements. Please provide any written additions/edits that you would like to see made to this definition.                                                                                                                                                                                                                                                                                                                                                                                                                                                                                                                                                       |
| 13 | Advocate or Representation: peer advocate, parental consultant, representative at local, provincial, and federal levels. Please provide any written additions/edits that you would like to see made to this definition.                                                                                                                                                                                                                                                                                                                                                                                                                                                                                                                                               |
| 14 | Providers or Professionals: coordinate care with specialists, collaborate with stakeholders, provide a roadmap of care, and facilitate understanding of the role of the specialist(s). Please provide any written additions/edits that you would like to see made to this definition.                                                                                                                                                                                                                                                                                                                                                                                                                                                                                 |
| 15 | The term transitions received an average rating of 95, indicating respondents agreed strongly the word services was an appropriate descriptive term. Respondents noted that Transitions was a very important component for the parent-to-parent framework and belonged as a main topic heading along with System Navigation. It is agreed that Transitions is a very important component to the framework and belongs with the heading System Navigation. Revising the label to read System Navigation and Transitions is appropriate                                                                                                                                                                                                                                 |
| 16 | The term services received an average rating of 94, indicating respondents agreed strongly the word services was an appropriate descriptive term. Services: maneuvering through health care, school, legal and community services. It is agreed that Services is the appropriate descriptor. Please provide any written additions/edits that you would like to see made to the definition of Services.                                                                                                                                                                                                                                                                                                                                                                |
| 17 | The term information received an average rating of 91, indicating respondents strongly agreed the word information was an appropriate descriptive term. Respondents noted that insight, context and experience are just as important as information. We agree that life experience is invaluable and believe that this is included in Contribution and Connection Information: parent-to-parent support provides accurate, well-balanced and comprehensive information regarding technological and research advancements, communication and assistive device options. It is agreed that Information is the appropriate descriptor. Please provide any written additions/edits that you would like to see made to the definition of Information.                       |
| 18 | The term resources received an average rating of 89, indicating respondents agreed the word resources was an appropriate descriptive term. To provide clarification and to differentiate it from other resources included in the framework (such as financial resources), we have changed the descriptor to Community Resources. Community Resources: provides referrals to recognized affiliations, community partners and support programs. It is agreed that Community Resources is the appropriate descriptor. Please provide any written additions/edits that you would like to see made to the definition of Community Resources.                                                                                                                               |
| 19 | Training or Skills: parent-to-parent support provides skill-based instruction, such as sign language and device-appropriate technological skills, as a supplement to provider/professional support. Please provide any written additions/edits that you would like to see made to this definition.                                                                                                                                                                                                                                                                                                                                                                                                                                                                    |

|           |                                                                                                                                                                                                                                                                                                                                                                                                                                                                                                                                                                                                                                                                                                                    |
|-----------|--------------------------------------------------------------------------------------------------------------------------------------------------------------------------------------------------------------------------------------------------------------------------------------------------------------------------------------------------------------------------------------------------------------------------------------------------------------------------------------------------------------------------------------------------------------------------------------------------------------------------------------------------------------------------------------------------------------------|
| <b>20</b> | The term engagement received an average rating of 95, indicating respondents agreed strongly the word engagement was an appropriate descriptive term. Engagement: parent-to-parent support helps learning parent(s) with their ability and readiness to assume their parental role and engage in their child's habilitation process. It is agreed that engagement is the appropriate descriptor. Please provide any written additions/edits that you would like to see made to the definition of Engagement.                                                                                                                                                                                                       |
| <b>21</b> | The term decision making received an average rating of 92, indicating respondents agreed strongly the descriptor 'decision making' was appropriate. Decision making: parent-to-parent support provides access to knowledge and resources, and the opportunity to cultivate ideas for informed decision-making. It is agreed that decision-making is the appropriate descriptor. Please provide any written additions/edits that you would like to see made to the definition of decision making.                                                                                                                                                                                                                   |
| <b>22</b> | The term parenting received an average rating of 91, indicating respondents agreed strongly the descriptor 'parenting' was appropriate. Based on your feedback, the definition associated with the descriptor 'parenting' has been revised. Parenting: parent-to-parent support provides practical parenting skills (e.g. teaching their child to safely cross the street), offers parenting advice to improve parent-child interactions and encourages responsive parenting to support the child's communication development in daily life. It is agreed that parenting is the appropriate descriptor. Please provide any written additions/edits that you would like to see made to the definition of parenting. |
| <b>23</b> | The term problem-solving received an average rating of 94, indicating respondents agreed strongly the descriptor 'problem-solving' was appropriate. Problem-solving: parent-to-parent support empowers parents to trust their coping abilities and acquire problem-solving skills specific to a child who is deaf or hard of hearing. It is agreed that problem-solving is the appropriate descriptor. Please provide any written additions/edits that you would like to see made to the definition of problem-solving.                                                                                                                                                                                            |
| <b>24</b> | Adaptation or Self-awareness: parent-to-parent support helps with adjustment and acceptance. Please provide any written additions/edits that you would like to see made to this definition.                                                                                                                                                                                                                                                                                                                                                                                                                                                                                                                        |
| <b>25</b> | Considering the revisions made to the framework: How certain are you now that the REVISED conceptual framework identifies the components and constructs of parent-to-parent support for parents with children who are Deaf or Hard of Hearing?                                                                                                                                                                                                                                                                                                                                                                                                                                                                     |
| <b>26</b> | Considering the revisions made to the framework: How certain are you that this REVISED conceptual framework has the ability to serve as a model for parent-to-parent support for parents of children who are deaf or hard of hearing?                                                                                                                                                                                                                                                                                                                                                                                                                                                                              |
| <b>27</b> | Considering the revisions made to the framework: Overall, how certain are you that this REVISED conceptual framework is applicable to your work and/or your colleagues work?                                                                                                                                                                                                                                                                                                                                                                                                                                                                                                                                       |
| <b>28</b> | We welcome additional comments related to version 2 of the framework below.                                                                                                                                                                                                                                                                                                                                                                                                                                                                                                                                                                                                                                        |
